# Supplementary material for: d-Cysteine occurrence in thiostrepton may not necessitate an epimerase
Source: Royal Society of Chemistry journal article supplement (doi:10.1039/b912733j), 2009-01-01

**D-CYSTEINE OCCURENCE IN THIOSTREPTON MAY NOT NECESSITATE AN  
EPIMERASE**

**Sebastian Schoof<sup>a,b</sup> and Hans-Dieter Arndt<sup>\*,a,b</sup>**

*<sup>a</sup>Technische Universität Dortmund, Fakultät Chemie, Otto-Hahn-Str. 6,  
D-44227 Dortmund, Germany;*

*<sup>b</sup>Max-Planck-Institut für Molekulare Physiologie, Chemische Biologie, Otto-Hahn-Str. 11,  
D-44227 Dortmund, Germany.*

*FAX: int+49(0)231-1332498;*

*Email: [hans-dieter.arndt@mpi-dortmund.mpg.de](mailto:hans-dieter.arndt@mpi-dortmund.mpg.de)*

**Supporting Information: 6 pages**

### Analytical HPLC methods

Varian ProStar, Diode Array Detector, flow = 1 mL /min, ternary gradient (A/B/C in v/v/v): A = bidest. H<sub>2</sub>O, B = CH<sub>3</sub>CN, C = 2% TFA in bidest. H<sub>2</sub>O.

A/B/C = 90/10/0 for 1 min, then to 0/70/0 in 16 min, then 0/100/0 for 2 min.

Column: 125 x 4 mm Nucleodur 5 µm C4 (Macherey & Nagel).

### Preparation of thiostrepton derivatives

To a stirred solution of thiostrepton **1** (1.0 g, 0.601 mmol) in CHCl<sub>3</sub> (50 ml) was added HNEt<sub>2</sub> (5 ml) dropwise at 0°C. After 5 min the reaction was continued at r.t. for 3 hrs. The volatiles were coevaporated with toluene and the residue was purified by silica gel column chromatography (2-5 % MeOH in CHCl<sub>3</sub>) to yield epimer **2**.

Purification of fractions containing the *L*-epimer **3** was achieved by additional preparative HPLC of appropriate fractions (C4 column, CH<sub>3</sub>CN/H<sub>2</sub>O) followed by lyophilization to provide **3**.

**D-epimer (2):** 70 % isolated yield, colorless powder, m.p. > 240 °C decomp., *R<sub>f</sub>* = 0.35 (CHCl<sub>3</sub>/MeOH 9:1). HPLC: *t<sub>R</sub>* = 14.1 min. <sup>1</sup>H NMR (400 MHz, CDCl<sub>3</sub>/MeOD 4:1) δ = 8.12 (s, 1H), 8.10 (s, 1H), 8.00 (s, 1H), 7.40 (s, 1H), 7.14 (s, 1H), 6.73 (d, *J* = 10.1 Hz, 1H), 6.46 (d, *J* = 1.7 Hz, 1H), 6.25 – 6.15 (m, 2H), 6.06 (q, *J* = 7.1 Hz, 1H), 5.67 (d, *J* = 2.1 Hz, 1H), 5.63 – 5.57 (m, 2H), 5.48 (d, *J* = 1.6 Hz, 1H), 5.18 (s, 1H), 5.16 – 5.12 (m, 2H), 4.81 (dd, *J* = 12.9, 8.9 Hz, 1H), 4.60 – 4.52 (m, 1H), 4.28 – 4.23 (m, 2H), 3.93 – 3.86 (m, 1H), 3.68 – 3.60 (m, 2H), 3.51 – 3.43 (m, 2H), 3.36 – 3.25 (m, 1H), 3.00 (dd, *J* = 13.0, 11.4 Hz, 1H), 2.80 (d, *J* = 4.3 Hz, 1H), 2.78 – 2.71 (m, 1H), 2.13 (t, *J* = 12.9 Hz, 1H), 1.79 – 1.71 (m, 1H), 1.55 (d, *J* = 6.6 Hz, 3H), 1.45 (d, *J* = 7.1 Hz, 3H), 1.42 – 1.37 (m, 1H), 1.26 (d, *J* = 6.6 Hz, 3H), 1.21 (d, *J* = 6.6 Hz, 3H), 1.13 (d, *J* = 6.4 Hz, 3H), 1.03 – 0.97 (m, 6H), 0.95 – 0.86 (m, 1H), 0.83 (d, *J* = 6.9 Hz, 3H), 0.72 (t, *J* = 7.3 Hz, 3H), 0.65 (d, *J* = 6.2 Hz, 3H). HRMS calcd. for [C<sub>69</sub>H<sub>83</sub>N<sub>18</sub>O<sub>17</sub>S<sub>5</sub>+H<sup>+</sup>] 1595.478, found (ESI) 1595.482.

**L-epimer (3):** 0.7 % isolated yield, colorless powder, m.p. > 240 °C decomp., *R<sub>f</sub>* = 0.31 (CHCl<sub>3</sub>/MeOH 9:1). HPLC: *t<sub>R</sub>* = 12.1 min. <sup>1</sup>H NMR (400 MHz, CDCl<sub>3</sub>/MeOD 4:1) δ = 8.07 (s, 2H), 8.04 (s, 1H), 7.38 (s, 1H), 7.11 (s, 1H), 6.69 (d, *J* = 10.2 Hz, 1H), 6.45 (d, *J* = 1.7 Hz, 1H), 6.25 – 6.14 (m, 2H), 6.11 – 6.03 (m, 1H), 5.70 – 5.64 (m, 2H), 5.49 – 5.45 (m, 1H), 5.35 (d, *J* = 8.5 Hz, 3H), 5.24 (s, 1H), 5.16 (s, 1H), 5.14 – 5.09 (m, 1H), 4.62 (dd, *J* = 13.4, 8.7 Hz, 1H), 4.57 – 4.53 (m, 1H), 4.29 (dd, *J* = 7.7, 4.0 Hz, 1H), 4.16 (s, 1H), 3.90 – 3.81 (m, 1H), 3.63 (q, *J* = 6.4 Hz, 1H), 3.60 – 3.56 (m, 1H), 3.45 (dd, *J* = 5.6, 2.1 Hz, 1H), 3.40 (dd, *J* = 11.2, 8.7 Hz, 1H), 3.13 – 3.07 (m, 1H), 2.78 (d, *J* = 4.7 Hz, 1H), 2.76 – 2.69 (m, 1H), 2.14 –

2.05 (m, 1H), 1.95 – 1.85 (m, 1H), 1.71 – 1.61 (m, 1H), 1.51 (dd,  $J = 11.5, 6.7$  Hz, 6H), 1.23 (dd,  $J = 14.8, 6.5$  Hz, 6H), 1.18 – 1.11 (m, 1H), 1.05 (d,  $J = 6.5$  Hz, 3H), 1.02 – 0.96 (m, 6H), 0.95 – 0.86 (m, 1H), 0.81 (d,  $J = 6.9$  Hz, 3H), 0.70 (t,  $J = 7.4$  Hz, 4H), 0.56 (d,  $J = 6.4$  Hz, 3H). HRMS calcd. for  $[C_{59}H_{82}N_{18}O_{17}S_5+H^+]$  1594.471, found (ESI) 1595.479.

### Preparation of ring-opened truncated thiostrepton

Compound **2** (150 mg, 0.09 mmol) was dissolved in 11 ml anhydrous MeOH/THF (8:3), followed by the addition of 60  $\mu$ l NaOMe solution (1 M in MeOH) at 0°C. The reaction was continued for 8 hours while the temperature was allowed to rise to rt. The volatiles were removed and unreacted starting material was removed from the crude mixture (79 % conversion) by silica gel column chromatography (5 % MeOH in  $CHCl_3$ ) to give 114 mg of the isomer mixture containing compounds **5** and **6** in approx 1:1 ratio (HPLC). Separation of the two isomers was achieved by preparative HPLC (C4 column,  $CH_3CN/H_2O$ ).

**5**: isolated 6.6 mg, colorless powder, m.p. > 240 °C decomp.,  $R_f = 0.16$  ( $CHCl_3/MeOH$  9:1). HPLC:  $t_R = 10.9$  min.  $^1H$  NMR (600 MHz,  $CDCl_3/MeOD$  4:1)  $\delta = 8.06$  (s, 1H), 8.02 (s, 1H), 8.02 (s, 1H), 6.84 (s, 1H), 6.66 (d,  $J = 9.7$  Hz, 1H), 6.43 (s, 1H), 6.07 (s, 1H), 6.03 (d,  $J = 8.3$  Hz, 1H), 5.53 (s, 1H), 5.49 (s, 2H), 5.46 – 5.41 (m, 1H), 5.29 (s, 1H), 4.98 – 4.85 (m, 3H), 4.77 (d,  $J = 11.7$  Hz, 1H), 4.17 – 4.11 (m,  $J = 7.1$  Hz, 3H), 3.85 – 3.81 (m, 2H), 3.76 (s, 3H), 3.66 (dd,  $J = 12.5, 6.1$  Hz, 3H), 3.52 – 3.47 (m, 1H), 3.36 – 3.25 (m, 1H), 2.92 – 2.85 (m, 1H), 2.77 (s, 1H), 1.85 – 1.75 (m, 2H), 1.61 (t,  $J = 8.7$  Hz, 3H), 1.46 – 1.37 (m, 3H), 1.31 (d,  $J = 7.2$  Hz, 3H), 1.29 – 1.22 (m, 6H), 1.22 – 1.15 (m, 1H), 1.09 (d,  $J = 6.4$  Hz, 3H), 1.04 (d,  $J = 6.3$  Hz, 3H), 0.97 (s, 3H), 0.88 (d,  $J = 6.9$  Hz, 3H), 0.78 (s, 3H). LCMS (ESI) found 1627.19. HRMS calcd. for  $[C_{70}H_{86}O_{18}N_{18}S_5+H^+]$  1627.504, found (ESI) 1627.505.

**6**: isolated 5.6 mg, colorless powder, m.p. > 240 °C decomp.,  $R_f = 0.18$  ( $CHCl_3/MeOH$  9:1). HPLC:  $t_R = 11.2$  min.  $^1H$  NMR (600 MHz,  $CDCl_3/MeOD$  4:1)  $\delta = 8.07$  (s, 1H), 8.01 (s, 2H), 7.81 (s, 1H), 6.72 (s, 1H), 6.67 (d,  $J = 10.2$  Hz, 1H), 6.42 (s, 1H), 6.18 (s, 1H), 6.03 (d,  $J = 10.3$  Hz, 1H), 5.72 – 5.64 (m, 1H), 5.48 (d,  $J = 1.3$  Hz, 2H), 5.45 – 5.40 (m, 1H), 5.25 (s, 1H), 4.90 (q,  $J = 6.4$  Hz, 2H), 4.85 – 4.79 (m, 1H), 4.75 (d,  $J = 11.9$  Hz, 1H), 4.40 (s, 1H), 4.36 – 4.31 (m, 1H), 4.20 – 4.13 (m, 4H), 3.84 – 3.81 (m, 1H), 3.77 (s, 3H), 3.62 – 3.53 (m, 3H), 3.46 – 3.39 (m, 3H), 2.92 – 2.85 (m, 1H), 1.84 – 1.76 (m, 1H), 1.67 (d,  $J = 6.8$  Hz, 3H), 1.46 – 1.39 (m,  $J = 6.6$  Hz, 2H), 1.29 (d,  $J = 7.2$  Hz, 3H), 1.27 (d,  $J = 6.5$  Hz, 3H), 1.25 – 1.21 (m, 3H), 1.20 (d,  $J = 7.2$  Hz, 3H), 1.12 – 1.07 (m, 3H), 1.04 (d,  $J = 5.8$  Hz, 3H), 0.86 (d,  $J = 6.9$  Hz, 3H), 0.77 (dd,  $J = 9.3, 5.4$  Hz, 3H). LCMS (ESI) found 1627.19. HRMS calcd. for  $[C_{70}H_{86}O_{18}N_{18}S_5+H^+]$  1627.504, found (ESI) 1627.505.

### NMR titrations / Kinetics

10 mg thiostrepton **1** was dissolved in 500  $\mu\text{l}$  THF- $d_8$  followed by the addition of 95  $\mu\text{l}$  buffer pH 12 (50 mM  $\text{Na}_2\text{CO}_3$  in  $\text{D}_2\text{O}$ ). 1D- $^1\text{H}$ -NMR spectra were recorded on a Varian 400 MHz spectrometer at different time intervals. The raw data was processed and the peak corresponding to the  $\alpha$ -proton of the thiazoline (at 5.1 ppm) was integrated for the different time points. The values were normalized to non-exchanging protons of the molecule, and plotted against the time.

The data was fitted to a bi-exponential decay model according to the equation:

$$y = A1 \cdot \exp(-x/t1) + A2 \cdot \exp(-x/t2) + y0$$

| Chi <sup>2</sup> | R <sup>2</sup> |
|------------------|----------------|
| 0.00046          | 0.99334        |

| Parameter | Value      | Error       |
|-----------|------------|-------------|
| y0        | -1.13845   | 32.40731    |
| x0        | -6.8244E-8 | --          |
| A1        | 0.5576     | --          |
| t1        | 12.94255   | 5.25693     |
| A2        | 1.55263    | --          |
| t2        | 644.20996  | 15366.80749 |

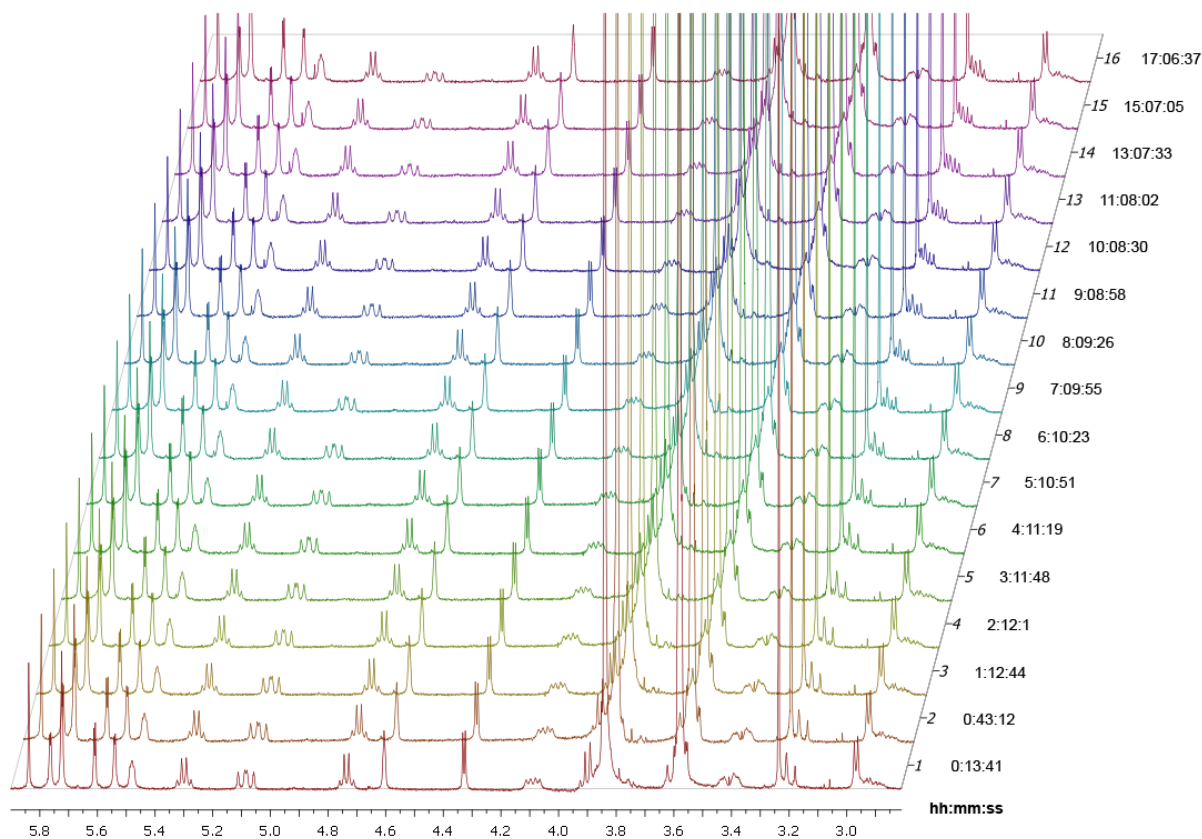

## Selected NMR spectra

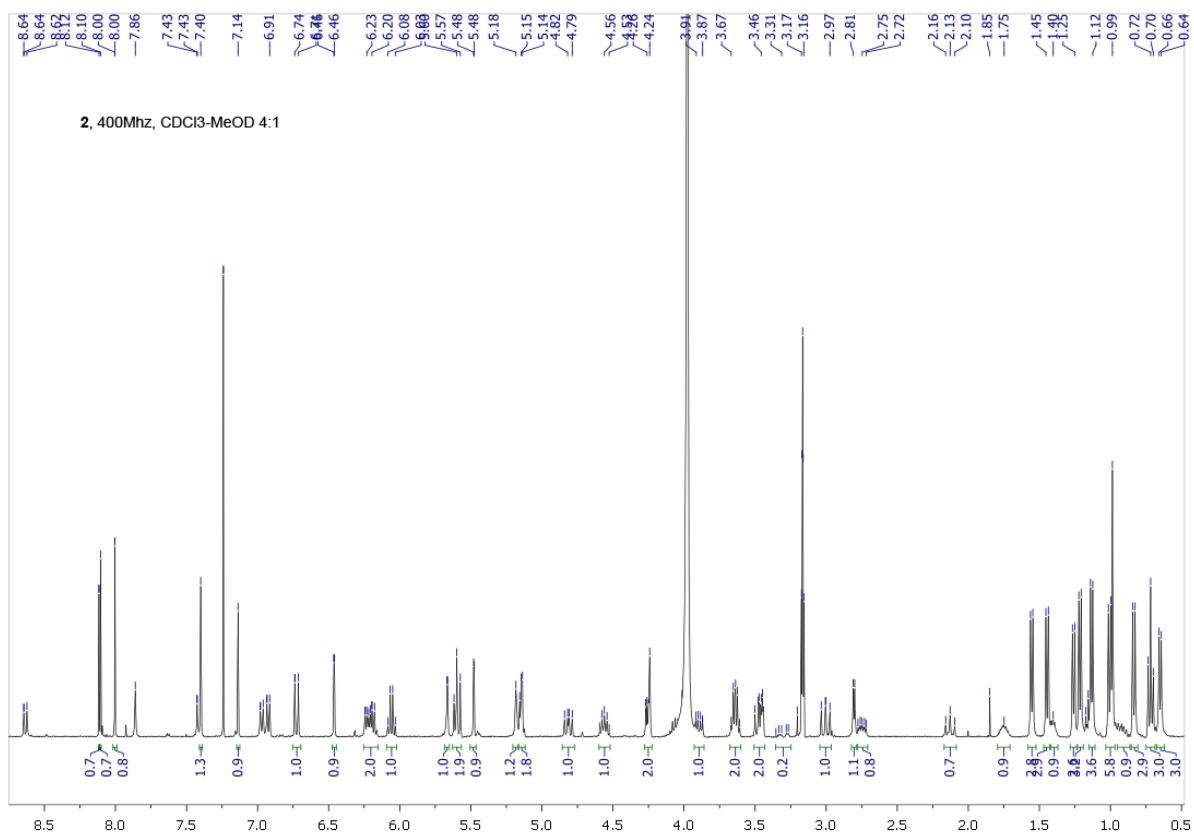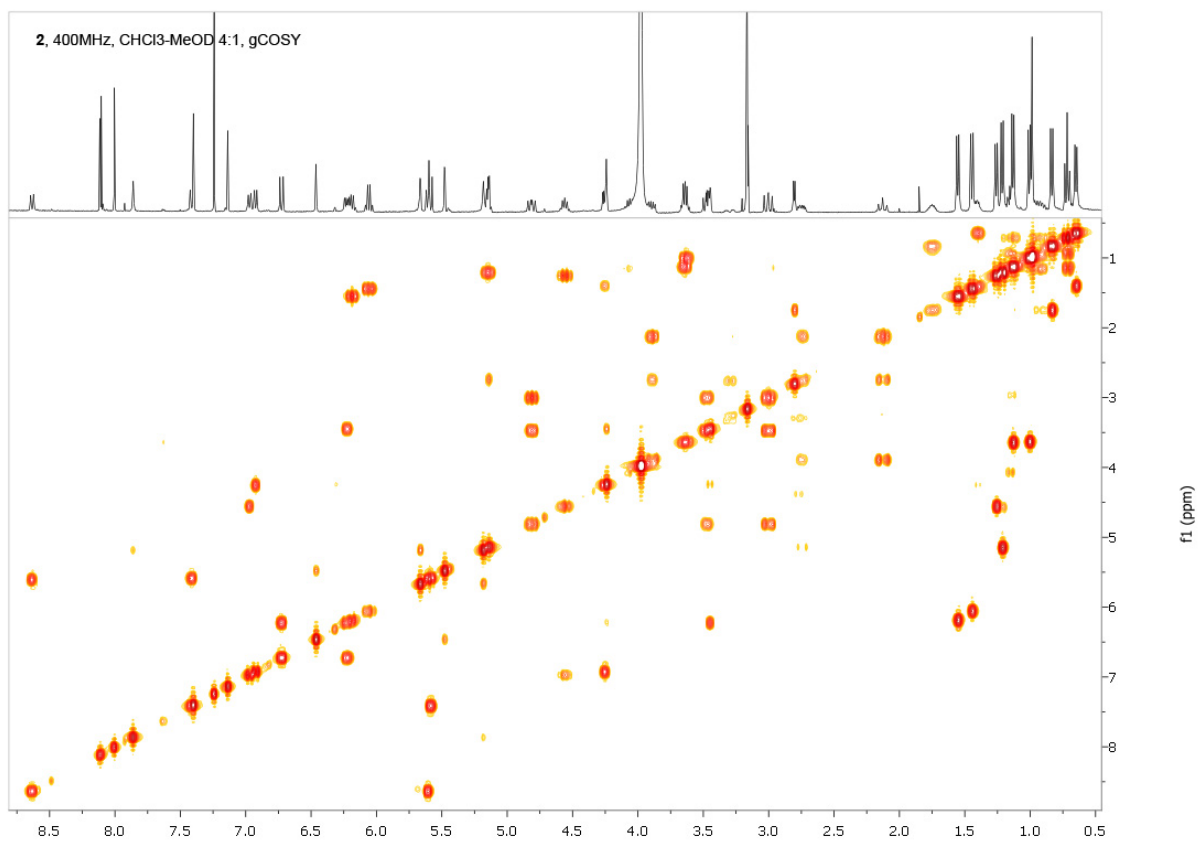

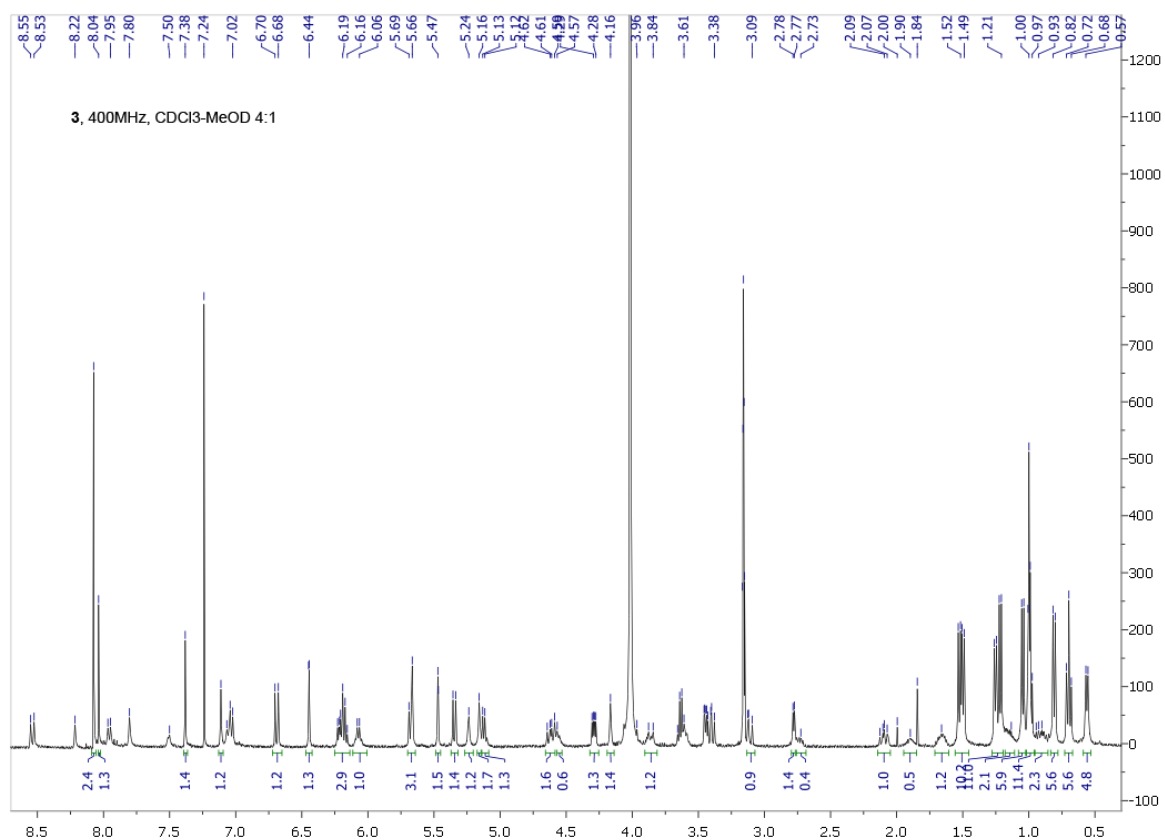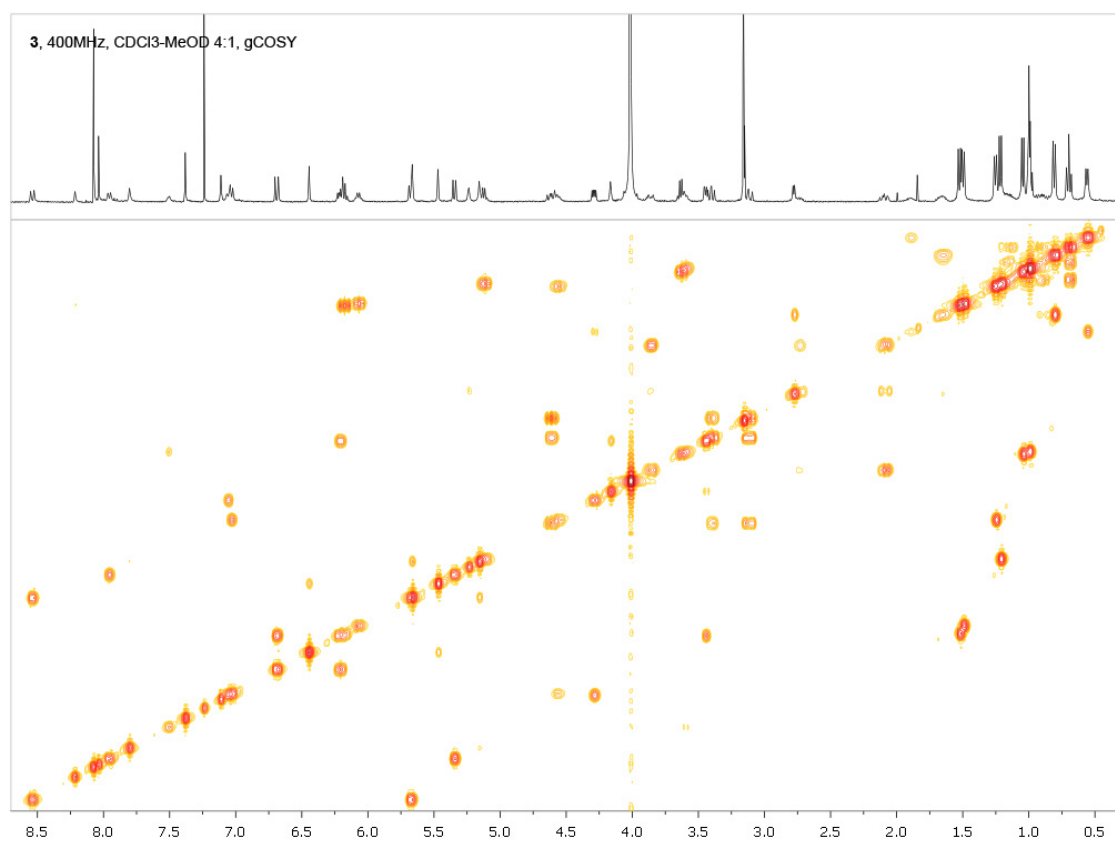

Supplement: b912733j.pdf [file b912733j.pdf]
